# Supplementary material for: Improving the luminescence performance of quantum dot-based photonic crystals for white-light emission
Source: Royal Society of Chemistry journal article supplement (doi:10.1039/c5tc02428e), 2015-11-19
Supplement: c5tc02428e1.pdf [file c5tc02428e1.pdf]

## Supporting Information:

### Improving luminescence performance of quantum dots-based on photonic crystals for white-light-emission

Heng Li<sup>a</sup>, Zhaohua Xu<sup>a, \*</sup>, Bin Bao<sup>b</sup>, Ning Sun<sup>a</sup> and Yanlin Song<sup>b, \*</sup>

a. Department of Material Technology, Jiangmen Polytechnic, Jiangmen, Guangdong 529090, China.

b. Beijing National Laboratory for Molecular Sciences (BNLMS), Key Laboratory of Green Printing, Key Laboratory of Organic Solids, Institute of Chemistry, Chinese Academy of Sciences, Beijing 100190, China.

\*Corresponding author. E-mail: xuzhaohua@iccas.ac.cn

ylsong@iccas.ac.cn

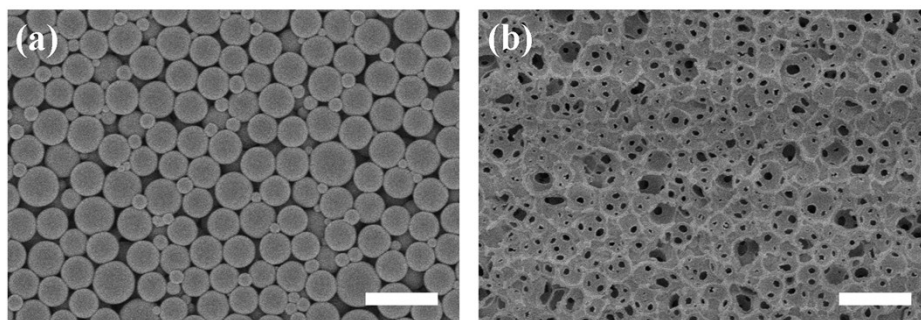

**Figure S1** SEM images of nonperiodic SiO<sub>2</sub> latex template and the corresponding porous nonperiodic SiO<sub>2</sub> materials. Scale bar =1  $\mu\text{m}$ .

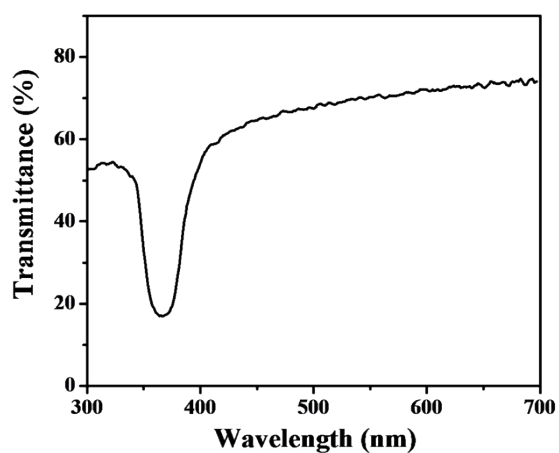

**Figure S2** The transmittance spectra for PC film of SiO<sub>2</sub> inverse opals. The transmittance of PC film is about 70% in the visible spectral range.
